# Supplementary material for: The Entomopathogenic Fungus Metarhizium anisopliae Affects Feeding Preference of Sogatella furcifera and Its Potential Targets’ Identification
Source: MDPI journal article supplement (doi:10.3390/jof8050506), 2022-05-15
Supplement: s1 [file s1]

**Figure S1.** The Venn diagram of DEGs after the fungal infection.

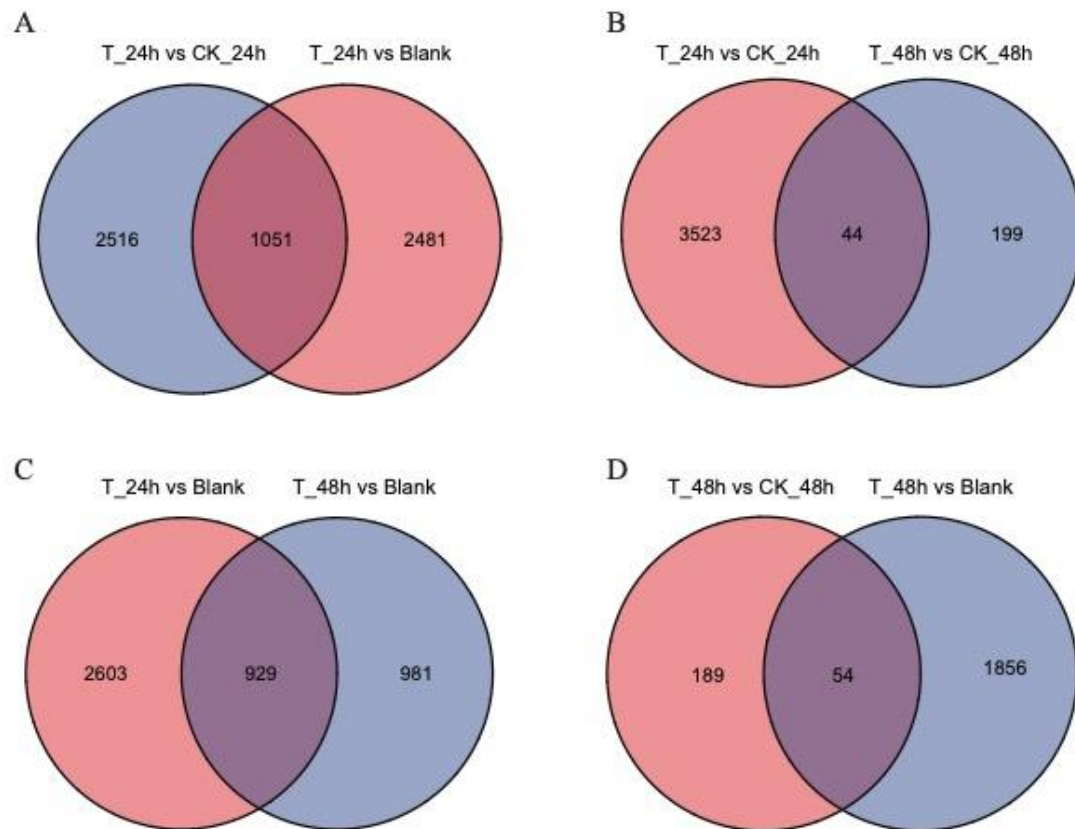

The Venn diagram of DEGs after the fungal infection at 0, 24h and 48h. A, the number of DEGs in Venn diagram of T-24h vs CK-24h and T-24h vs 0h; B, the number of DEGs in Venn diagram of T-24h vs CK-24h and T-48h vs CK-48h; C, the number of DEGs in Venn diagram of T-24h vs 0h and T-48h vs 0h; D, the number of DEGs in Venn diagram of T-48h vs CK-48h and T-48h vs CK-0h.

**Table S1.** The primers used for RT-qPCR in this study.

| Gene ID  | Primer directions | Primer sequences (5'-3') |
|----------|-------------------|--------------------------|
| SF_71628 | Forward           | GACGAGGAGTTCACCCTGGA     |
|          | Reverse           | TTGGTGAGCGATGCCAGTTC     |
| SF_37201 | Forward           | TCCTATGACATCACAACA       |
|          | Reverse           | GACCAGAACAGTAACTAAC      |
| SF_85517 | Forward           | GTGGTTCCCAATGCTCAGGG     |
|          | Reverse           | TGCCAGATCCATGTTTCAGCC    |
| SF_21568 | Forward           | GCTACACGTCAGGCACAACA     |
|          | Reverse           | GTACATCCCGTTCTCGCAGC     |
| SF_22758 | Forward           | TGGAGGTTACGGCAGAGCTT     |
|          | Reverse           | CCAGGTAGCCTCCTTCACCA     |
| SF_12678 | Forward           | GAGGCTACTCGTGGGTGGAT     |
|          | Reverse           | CGCAGAGGTAGTCGCAGTTG     |
| SF_44928 | Forward           | GCTCAGATGGTGGGATTGGC     |
|          | Reverse           | TTGGCAAGCTGATGCTGGAC     |
| SF_48818 | Forward           | CATTCCTGAGAGAGTAGT       |
|          | Reverse           | TTACCTATTGAAGAGAACAC     |
| SF_90533 | Forward           | GTCACGACGCCTCCAAAGTC     |
|          | Reverse           | CCGAGTGAGGCTTGTCGTTT     |
| SF_86484 | Forward           | AAGTAGTGAAGGCTAAGG       |
|          | Reverse           | CTGGAGTGGAGAAGTATT       |
| SF_90468 | Forward           | CTGCGGTACAGGGTCTGGTA     |
|          | Reverse           | ACTTGTACTGTCCCGCTCCA     |
| SF_81066 | Forward           | TGACACCCACCTCACACGAT     |
|          | Reverse           | AGCGCACAGTATCTCCGAGT     |
| SF_59264 | Forward           | GACGAGGAGTTCACCCTGGA     |
|          | Reverse           | TTGGTGAGCGATGCCAGTTC     |
| SF_64627 | Forward           | GCACACCGTCCAGTTCTACG     |
|          | Reverse           | ACAGCCAGCGTGATATTGGC     |
| SF_69858 | Forward           | GTGGTTGTCTCTGTCTAC       |
|          | Reverse           | ACGGTGTGAAGGATATTG       |
| SF_75041 | Forward           | ATGCAGGACGACTGGAGACA     |
|          | Reverse           | ACGCTCGTACTGCTCCTGAT     |
| SF_78228 | Forward           | ATACCAGGCTCAGGCGACAT     |
|          | Reverse           | GAAAGTGCGGCGTTAGTGGA     |

|            |         |                       |
|------------|---------|-----------------------|
| SF_72650   | Forward | CCACAGTTCAGGCCGTTTCAG |
|            | Reverse | CTTGTCGCTCACGCAGTTGA  |
| SF_54617   | Forward | TCCCGATCACGAGTCCTTGG  |
|            | Reverse | TTTGACAGAGCCCAGACCCA  |
| SF_23121   | Forward | ACGCCAGCAGCAGGATTTC   |
|            | Reverse | GCCAACTCCCTTTCAGCACTA |
| SF_β-actin | Forward | GTGACTTGACCGACTACC    |
|            | Reverse | TCTCCTTGATGTCCCTGA    |

---

**Table S2.** The descriptions of commonly expressed DEGs in Venn diagram of 24h vs 48h after *M. anisopliae* infection.

| Gene ID    | FoldChange<br>(Log2) | P-value  | NR_Description                                                                                           | KOG_Description                                             |
|------------|----------------------|----------|----------------------------------------------------------------------------------------------------------|-------------------------------------------------------------|
| Novel00528 | 2.5                  | 1.75E-03 | LOC100569743<br>[ <i>Acyrtosiphon pisum</i> ]                                                            | -                                                           |
| Novel00733 | 1.26                 | 1.54E-03 | -                                                                                                        | -                                                           |
| g14910     | 1.59                 | 4.12E-13 | Glycerol-3-phosphate<br>dehydrogenase,<br>mitochondrial isoform<br>X2 [ <i>Polistes<br/>canadensis</i> ] | Glycerol-3-phosphate<br>dehydrogenase                       |
| g16571     | 1.18                 | 2.88E-02 | LOC100889621<br>[ <i>Strongylocentrotus<br/>purpuratus</i> ]                                             | FOG: Reverse<br>transcriptase                               |
| g17653     | 1.73                 | 1.96E-03 | RNA-directed DNA<br>polymerase from<br>transposon BS<br>[ <i>Exaiptasia pallida</i> ]                    | -                                                           |
| g20931     | 1.07                 | 2.78E-03 | Homeobox protein<br>ARX [ <i>Camponotus<br/>floridanus</i> ]                                             | Transcription factor,<br>contains HOX domain                |
| g21429     | 2.25                 | 3.44E-34 | Troponin C, isoform 1<br>[ <i>Trachymyrmex<br/>cornetzi</i> ]                                            | Calmodulin and related<br>proteins (EF-Hand<br>superfamily) |
| g22334     | 1.48                 | 5.28E-07 | Putative RNA-directed<br>DNA polymerase from<br>transposon BS, partial<br>[ <i>Exaiptasia pallida</i> ]  | FOG: Reverse<br>transcriptase                               |
| g25610     | 1.05                 | 3.21E-02 | -                                                                                                        | -                                                           |
| g25755     | -1.66                | 3.16E-02 | TPA_inf: HDC03386<br>[ <i>Drosophila<br/>melanogaster</i> ]                                              | -                                                           |
| g27842     | 4.83                 | 1.65E-04 | -                                                                                                        | -                                                           |
| g28303     | -3.9                 | 5.33E-03 | -                                                                                                        | -                                                           |
| g30040     | 1.56                 | 2.71E-08 | -                                                                                                        | -                                                           |
| g30622     | 2.56                 | 7.76E-06 | -                                                                                                        | -                                                           |

|        |       |          |                                                                                                                |                                                                  |
|--------|-------|----------|----------------------------------------------------------------------------------------------------------------|------------------------------------------------------------------|
| g30624 | 2.25  | 3.62E-03 | Down syndrome cell<br>adhesion molecule-like<br>protein Dscam2<br>isoform X2<br>[ <i>Drosophila kikkawai</i> ] | -                                                                |
| g36165 | -1.24 | 4.10E-02 | Sphingosine kinase 1<br>[ <i>Dinoponera<br/>quadriceps</i> ]                                                   | Sphingosine kinase,<br>involved in<br>sphingolipid<br>metabolism |
| g36183 | 1.89  | 8.02E-03 | RNA-directed DNA<br>polymerase from<br>transposon BS<br>[ <i>Exaiptasia pallida</i> ]                          | FOG: Reverse<br>transcriptase                                    |
| g37069 | 1.63  | 3.50E-03 | LOC100158863<br>[ <i>Acyrtosiphon pisum</i> ]                                                                  | -                                                                |
| g38088 | -1.21 | 1.27E-02 | -                                                                                                              | -                                                                |
| g41009 | -2.44 | 4.09E-15 | Tumor protein p63<br>isoform alpha 2-like<br>isoform X1<br>[ <i>Acyrtosiphon pisum</i> ]                       | -                                                                |
| g41996 | 2.18  | 1.16E-04 | -                                                                                                              | -                                                                |
| g42342 | -1    | 2.27E-02 | -                                                                                                              | -                                                                |
| g46844 | 2.14  | 2.78E-02 | LOC106664738<br>[ <i>Cimex lectularius</i> ]                                                                   | -                                                                |
| g47705 | 1.54  | 8.70E-06 | Ninjurin-2-like isoform<br>X2 [ <i>Halyomorpha<br/>halys</i> ]                                                 | -                                                                |
| g48160 | -2.92 | 2.31E-02 | TcasGA2_TC000033<br>[ <i>Tribolium castaneum</i> ]                                                             | FOG: Reverse<br>transcriptase                                    |
| g48810 | 2.71  | 3.91E-03 | RNA-directed DNA<br>polymerase from<br>transposon X-element<br>[ <i>Exaiptasia pallida</i> ]                   | FOG: Reverse<br>transcriptase                                    |
| g50002 | 1.78  | 1.62E-15 | ADP,ATP carrier<br>protein 2-like<br>[ <i>Diaphorina citri</i> ]                                               | Mitochondrial<br>ADP/ATP carrier<br>proteins                     |

|        |       |          |                                                                                                           |                                                                               |
|--------|-------|----------|-----------------------------------------------------------------------------------------------------------|-------------------------------------------------------------------------------|
| g51188 | -1.32 | 4.74E-02 | A disintegrin and metalloproteinase with thrombospondin motifs 15 isoform X4 [ <i>Halyomorpha halys</i> ] | Disintegrin metalloproteinases with thrombospondin repeats                    |
| g54686 | -3.8  | 7.66E-03 | -                                                                                                         | -                                                                             |
| g59563 | -1.2  | 2.30E-02 | BRAFLDRAFT_57765 [ <i>Branchiostoma floridae</i> ]                                                        | FOG: Zn-finger                                                                |
| g6292  | -3.77 | 1.04E-07 | RR46_07295 [ <i>Papilio xuthus</i> ]                                                                      | -                                                                             |
| g64784 | 2.34  | 3.95E-05 | -                                                                                                         | -                                                                             |
| g65179 | -2.4  | 7.11E-06 | -                                                                                                         | -                                                                             |
| g75215 | -2.57 | 7.53E-07 | Midasin [ <i>Bombus impatiens</i> ]                                                                       | AAA ATPase containing von Willebrand factor type A (vWA) domain               |
| g75912 | 2.11  | 2.24E-04 | Transient-receptor-potential-like protein [ <i>Papilio polytes</i> ]                                      | Receptor-activated Ca <sup>2+</sup> -permeable cation channels (STRPC family) |
| g82369 | 3.3   | 1.95E-03 | Fatty acyl-CoA reductase CG5065-like isoform X2 [ <i>Apis dorsata</i> ]                                   | Acyl-CoA reductase                                                            |
| g86062 | -3.12 | 2.12E-04 | -                                                                                                         | -                                                                             |
| g86484 | 1.22  | 8.41E-05 | Malate dehydrogenase, mitochondrial [ <i>Nasonia vitripennis</i> ]                                        | NAD-dependent malate dehydrogenase                                            |
| g87277 | 3.61  | 3.51E-02 | D(1)-like dopamine receptor-like [ <i>Saccoglossus kowalevskii</i> ]                                      | FOG: Reverse transcriptase                                                    |
| g87789 | -4.29 | 1.64E-04 | TcasGA2_TC031726 [ <i>Tribolium castaneum</i> ]                                                           | -                                                                             |
| g89284 | 3.42  | 3.43E-02 | RNA-binding protein squid-like isoform X2 [ <i>Hyalomma azteca</i> ]                                      | Large RNA-binding protein (RRM superfamily)                                   |

|        |       |          |                                                                                     |                                               |
|--------|-------|----------|-------------------------------------------------------------------------------------|-----------------------------------------------|
| g89797 | -2.87 | 6.91E-05 | CXXC-type zinc<br>finger protein 1-like<br>[ <i>Megachile rotundata</i> ]           | Uncharacterized PHD<br>Zn-finger protein      |
| g89907 | 1.46  | 9.17E-08 | Phosphate carrier<br>protein, mitochondrial<br>[ <i>Dufourea<br/>novaeangliae</i> ] | Mitochondrial<br>phosphate carrier<br>protein |
| g91067 | 1.3   | 3.52E-02 | -                                                                                   | -                                             |

---

**Table S3.** Top 20 highly or lowly DEGs in different *M. anisopliae* infection.

| Treatment         | Gene ID | Fold change<br>(log2) | P-value  | Down/Up<br>regulated | Description                                                                 |
|-------------------|---------|-----------------------|----------|----------------------|-----------------------------------------------------------------------------|
| T-24h vs<br>Blank | g51856  | -8.46                 | 1.54E-04 | Down                 | Dvir_GJ12963                                                                |
|                   | g89208  | -7.70                 | 5.33E-04 | Down                 | CG1732                                                                      |
|                   | g32190  | -7.42                 | 5.31E-04 | Down                 | N/A                                                                         |
|                   | g71166  | -7.36                 | 3.75E-03 | Down                 | N/A                                                                         |
|                   | g53545  | -7.17                 | 5.95E-05 | Down                 | Cuticular protein 58, RR-2<br>family                                        |
|                   | g79132  | -7.04                 | 1.82E-03 | Down                 | Dpse_GA24754                                                                |
|                   | g51258  | -7.04                 | 4.83E-04 | Down                 | N/A                                                                         |
|                   | g51851  | -6.89                 | 4.85E-03 | Down                 | Cuticular protein RR-2<br>motif 77 precursor                                |
|                   | g12691  | -6.81                 | 1.19E-03 | Down                 | LOC107226440 isoform<br>X1                                                  |
|                   | g18673  | -6.74                 | 2.03E-03 | Down                 | N/A                                                                         |
|                   | g71170  | -6.73                 | 6.46E-03 | Down                 | N/A                                                                         |
|                   | g17768  | -6.64                 | 1.19E-03 | Down                 | Nuclear factor of activated<br>T-cells 5 isoform X3                         |
|                   | g74330  | -6.59                 | 6.83E-05 | Down                 | N/A                                                                         |
|                   | g16831  | -6.32                 | 7.04E-06 | Down                 | N/A                                                                         |
|                   | g17771  | -6.21                 | 1.62E-03 | Down                 | LOC105555728                                                                |
|                   | g80315  | -6.11                 | 2.53E-02 | Down                 | Elongation of very long<br>chain fatty acids protein                        |
|                   | g17767  | -6.09                 | 1.72E-03 | Down                 | Predicted protein                                                           |
|                   | g4624   | -6.08                 | 6.36E-03 | Down                 | Ejaculatory bulb-specific<br>protein 3-like                                 |
|                   | g39720  | -6.07                 | 1.36E-03 | Down                 | Nose resistant to<br>fluoxetine protein 6-like                              |
|                   | g85623  | -6.06                 | 1.66E-03 | Down                 | LOC103317810                                                                |
|                   | g39683  | 6.09                  | 5.26E-06 | Up                   | Retrovirus-related Pol<br>polyprotein from<br>transposon 17.6 isoform<br>X4 |
|                   | g72813  | 5.86                  | 3.58E-05 | Up                   | N/A                                                                         |
|                   | g78763  | 5.85                  | 3.50E-12 | Up                   | N/A                                                                         |



|                    |        |        |          |      |                                                              |
|--------------------|--------|--------|----------|------|--------------------------------------------------------------|
|                    | g66461 | 5.71   | 2.69E-03 | Up   | N/A                                                          |
|                    | g6565  | 5.67   | 2.19E-05 | Up   | Hypothetical protein<br>LOTGIDRAFT_155849                    |
|                    | g72427 | 5.46   | 5.31E-04 | Up   | N/A                                                          |
|                    | g48188 | 5.38   | 2.44E-04 | Up   | LOC108374527                                                 |
|                    | g33838 | 5.28   | 4.22E-02 | Up   | N/A                                                          |
|                    | g27598 | 5.27   | 1.45E-03 | Up   | N/A                                                          |
|                    | g63890 | 5.11   | 1.93E-02 | Up   | Hypothetical protein<br>T265_07045                           |
|                    | g25215 | 5.00   | 2.20E-03 | Up   | N/A                                                          |
|                    | g48732 | 4.98   | 6.62E-03 | Up   | N/A                                                          |
|                    | g85337 | 4.93   | 6.64E-03 | Up   | N/A                                                          |
|                    | g54345 | 4.90   | 1.59E-02 | Up   | Putative RNA-directed<br>DNA polymerase                      |
|                    | g4457  | 4.89   | 2.05E-02 | Up   | N/A                                                          |
|                    | g11837 | 4.83   | 1.63E-02 | Up   | Pol protein                                                  |
|                    | g72815 | 4.75   | 5.33E-03 | Up   | N/A                                                          |
|                    | g8624  | 4.72   | 1.41E-02 | Up   | N/A                                                          |
|                    | g68430 | 4.72   | 1.41E-02 | Up   | LOC107358461                                                 |
|                    | g36211 | 4.71   | 7.52E-04 | Up   | RNA-directed DNA<br>polymerase from mobile<br>element jockey |
|                    | g23323 | 4.71   | 1.43E-02 | Up   | RNA-directed DNA<br>polymerase from mobile<br>element jockey |
| T-24h vs<br>CK-24h | g75799 | -10.13 | 1.28E-09 | Down | N/A                                                          |
|                    | g32190 | -9.94  | 4.23E-36 | Down | N/A                                                          |
|                    | g75856 | -9.42  | 9.26E-03 | Down | N/A                                                          |
|                    | g89208 | -9.41  | 1.22E-24 | Down | N/A                                                          |
|                    | g89906 | -9.11  | 5.02E-06 | Down | vitellogenin                                                 |
|                    | g51258 | -9.10  | 1.18E-25 | Down | N/A                                                          |
|                    | g12691 | -8.33  | 1.59E-49 | Down | LOC107226440 isoform<br>X1                                   |
|                    | g85623 | -7.95  | 1.74E-23 | Down | LOC103317810                                                 |
|                    | g89900 | -7.93  | 4.21E-05 | Down | vitellogenin                                                 |
|                    | g85626 | -7.89  | 2.32E-16 | Down | LOC106786168, partial                                        |
|                    | g51259 | -7.84  | 3.86E-08 | Down | N/A                                                          |

|           |       |           |      |                                                                                        |
|-----------|-------|-----------|------|----------------------------------------------------------------------------------------|
| g89852    | -7.82 | 2.26E-23  | Down | Serine protease                                                                        |
| g36224    | -7.68 | 3.74E-122 | Down | N/A                                                                                    |
| g46261    | -7.65 | 1.06E-20  | Down | N/A                                                                                    |
| g28615    | -7.56 | 9.43E-54  | Down | Farnesol dehydrogenase                                                                 |
| g17768    | -7.50 | 2.31E-24  | Down | Nuclear factor of activated<br>T-cells 5 isoform X3                                    |
| g17771    | -7.48 | 1.31E-08  | Down | LOC105555728, partial                                                                  |
| g75800    | -7.44 | 1.40E-07  | Down | N/A                                                                                    |
| g89903    | -7.43 | 7.79E-04  | Down | vitellogenin-1-like                                                                    |
| g17767    | -7.37 | 7.96E-14  | Down | N/A                                                                                    |
| g36211    | 5.95  | 1.95E-04  | Up   | RNA-directed DNA<br>polymerase from mobile<br>element jockey-like<br>isoform X1        |
| g20540    | 5.48  | 2.50E-04  | Up   | LOC107228190                                                                           |
| g68132    | 5.42  | 1.69E-03  | Up   | RNA-directed DNA<br>polymerase from mobile<br>element jockey                           |
| g27842    | 4.83  | 1.65E-04  | Up   | N/A                                                                                    |
| g11366    | 4.82  | 6.43E-05  | Up   | N/A                                                                                    |
| g31405    | 4.81  | 4.15E-02  | Up   | RNA-directed DNA<br>polymerase from mobile<br>element jockey                           |
| g55041    | 4.78  | 8.15E-03  | Up   | N/A                                                                                    |
| g73578    | 4.70  | 1.40E-02  | Up   | N/A                                                                                    |
| Novel0046 | 4.61  | 1.89E-02  | Up   | N/A                                                                                    |
| 5         |       |           |      |                                                                                        |
| g87480    | 4.58  | 4.96E-02  | Up   | RNA-directed DNA<br>polymerase (reverse<br>transcriptase) domain<br>containing protein |
| g54809    | 4.56  | 4.53E-02  | Up   | OCBIM_22021513mg                                                                       |
| g4893     | 4.53  | 2.46E-02  | Up   | N/A                                                                                    |
| g40309    | 4.43  | 4.47E-02  | Up   | N/A                                                                                    |
| g62062    | 4.40  | 4.26E-02  | Up   | LOC108368960                                                                           |
| g67837    | 4.38  | 2.51E-02  | Up   | N/A                                                                                    |
| g8619     | 4.33  | 3.18E-02  | Up   | N/A                                                                                    |

|                   |        |       |          |      |                                                |
|-------------------|--------|-------|----------|------|------------------------------------------------|
|                   | g50341 | 4.28  | 3.33E-02 | Up   | N/A                                            |
|                   | g4305  | 4.24  | 4.45E-02 | Up   | LOC106083336                                   |
|                   | g20130 | 4.18  | 4.37E-02 | Up   | Hypothetical protein<br>EAG_00403, partial     |
|                   | g64596 | 4.12  | 3.57E-02 | Up   | N/A                                            |
|                   | g485   | 3.91  | 1.38E-02 | Up   | N/A                                            |
| T-48h vs<br>Blank | g71170 | -8.86 | 1.71E-03 | Down | N/A                                            |
|                   | g53545 | -8.51 | 1.68E-05 | Down | Cuticular protein 58, RR-2<br>family           |
|                   | g16840 | -8.15 | 1.07E-33 | Down | Pro-resilin                                    |
|                   | g74330 | -7.33 | 1.92E-05 | Down | N/A                                            |
|                   | g39720 | -7.13 | 4.41E-04 | Down | Nose resistant to<br>fluoxetine protein 6-like |
|                   | g66806 | -6.79 | 8.04E-05 | Down | Cytochrome P450                                |
|                   | g4624  | -6.72 | 3.95E-03 | Down | Ejaculatory bulb-specific<br>protein 3-like    |
|                   | g59286 | -6.67 | 5.06E-03 | Down | Nose resistant to<br>fluoxetine protein 6      |
|                   | g78005 | -6.67 | 1.69E-11 | Down | LOC108556711 isoform<br>X2                     |
|                   | g50614 | -6.67 | 1.24E-08 | Down | N/A                                            |
|                   | g24016 | -6.61 | 1.18E-08 | Down | GM13288                                        |
|                   | g69034 | -6.52 | 1.23E-03 | Down | Cytochrome P450 4V2                            |
|                   | g66804 | -6.47 | 3.27E-04 | Down | Cytochrome P450 18a1                           |
|                   | g7406  | -6.42 | 3.22E-06 | Down | Organic cation transporter<br>protein          |
|                   | g15861 | -6.20 | 8.20E-18 | Down | Cuticle protein 7                              |
|                   | g65004 | -6.19 | 3.33E-08 | Down | LOC105666492 isoform<br>X1                     |
|                   | g88916 | -6.05 | 3.32E-07 | Down | LOC106661408 isoform<br>X2                     |
|                   | g12362 | -6.03 | 2.86E-03 | Down | Protein yellow-like                            |
|                   | g30519 | -6.02 | 3.12E-08 | Down | N/A                                            |
|                   | g30535 | -6.00 | 7.95E-11 | Down | N/A                                            |
|                   | g79132 | -5.97 | 5.91E-03 | Down | Dpse_GA24754                                   |

|                    |        |        |          |      |                                                                                |
|--------------------|--------|--------|----------|------|--------------------------------------------------------------------------------|
|                    | g62949 | 11.73  | 6.10E-05 | Up   | N/A                                                                            |
|                    | g75856 | 10.61  | 3.74E-04 | Up   | N/A                                                                            |
|                    | g89903 | 9.58   | 2.14E-03 | Up   | Vitellogenin-1-like                                                            |
|                    | g89906 | 8.93   | 5.18E-05 | Up   | Vitellogenin                                                                   |
|                    | g89900 | 8.64   | 8.80E-05 | Up   | Vitellogenin                                                                   |
|                    | g28973 | 8.13   | 2.06E-04 | Up   | N/A                                                                            |
|                    | g29034 | 8.12   | 7.87E-03 | Up   | Protein O-linked-mannose<br>beta-1,2-N-<br>acetylglucosaminyltransfer<br>ase 1 |
|                    | g15379 | 7.19   | 1.53E-03 | Up   | Multiple inositol<br>polyphosphate<br>phosphatase 1-like isoform<br>X2         |
|                    | g45861 | 6.65   | 1.00E-03 | Up   | N/A                                                                            |
|                    | g15378 | 6.43   | 1.34E-03 | Up   | Multiple inositol<br>polyphosphate<br>phosphatase 1                            |
|                    | g31049 | 6.08   | 2.22E-03 | Up   | N/A                                                                            |
|                    | g82336 | 6.04   | 8.82E-03 | Up   | N/A                                                                            |
|                    | g50487 | 5.97   | 2.00E-04 | Up   | Odorant receptor 43a-2                                                         |
|                    | g63605 | 5.85   | 6.20E-04 | Up   | LOTGIDRAFT_212414                                                              |
|                    | g46020 | 5.77   | 1.50E-02 | Up   | N/A                                                                            |
|                    | g37859 | 5.71   | 1.27E-02 | Up   | N/A                                                                            |
|                    | g85812 | 5.63   | 1.48E-03 | Up   | Vitellogenin 1                                                                 |
|                    | g37858 | 5.44   | 9.38E-03 | Up   | N/A                                                                            |
|                    | g39683 | 5.41   | 1.48E-03 | Up   | Petrovirus-related Pol<br>polyprotein                                          |
| T-48h vs<br>CK-48h | g44681 | -11.12 | 3.47E-02 | Down | N/A                                                                            |
|                    | g29497 | -5.59  | 5.98E-03 | Down | Hypothetical protein                                                           |
|                    | g13833 | -4.84  | 1.06E-02 | Down | LOC108364196                                                                   |
|                    | g67454 | -4.58  | 2.48E-02 | Down | N/A                                                                            |
|                    | g48675 | -4.42  | 4.29E-02 | Down | Nucleic-acid-binding<br>protein                                                |
|                    | g85561 | -4.25  | 1.67E-02 | Down | N/A                                                                            |
|                    | g16176 | -4.22  | 4.15E-02 | Down | CAPTEDRAFT_91439,<br>partial                                                   |

|        |       |          |      |                                                                 |
|--------|-------|----------|------|-----------------------------------------------------------------|
| g40913 | -4.21 | 4.23E-02 | Down | RNA-directed DNA polymerase from mobile element jockey          |
| g10305 | -4.03 | 1.23E-02 | Down | LOC100680303                                                    |
| g40442 | -4.01 | 7.80E-03 | Down | LOC108253938                                                    |
| g85579 | -3.63 | 3.21E-02 | Down | N/A                                                             |
| g56305 | -3.60 | 4.88E-02 | Down | Cardioacceleratory peptide receptor 2 isoform X2                |
| g5984  | -3.58 | 1.14E-02 | Down | Defensin A                                                      |
| g47725 | -3.57 | 1.91E-02 | Down | Dana_GF27721                                                    |
| g27888 | -3.50 | 3.40E-02 | Down | Reverse ribonuclease integrase                                  |
| g30680 | -3.27 | 3.45E-02 | Down | PiggyBac transposable element-derived protein 4-like isoform X1 |
| g59266 | -3.24 | 1.74E-02 | Down | Ras GTPase-activating protein 1                                 |
| g58378 | -3.24 | 3.45E-02 | Down | N/A                                                             |
| g36683 | -3.23 | 1.93E-02 | Down | Zinc finger protein 271-like isoform X2                         |
| g30565 | -3.19 | 6.19E-04 | Down | N/A                                                             |
| g24308 | -3.12 | 1.83E-02 | Down | N/A                                                             |
| g65    | -3.11 | 2.22E-02 | Down | Retrovirus-related Pol polyprotein                              |
| g47480 | 6.45  | 3.34E-02 | Up   | N/A                                                             |
| g77554 | 5.90  | 4.75E-05 | Up   | N/A                                                             |
| g45775 | 5.00  | 2.26E-02 | Up   | ES protein                                                      |
| g21384 | 4.38  | 4.70E-02 | Up   | Rna-directed dna polymerase from mobile element jockey          |
| g65450 | 4.36  | 4.10E-02 | Up   | N/A                                                             |
| g71543 | 4.31  | 1.39E-04 | Up   | Adult-specific cuticular protein ACP-20-like isoform X1         |
| g57847 | 4.20  | 3.78E-02 | Up   | Putative RNA-directed DNA polymerase from transposon BS         |

|           |      |          |    |                                                                |
|-----------|------|----------|----|----------------------------------------------------------------|
| g49807    | 4.14 | 3.27E-02 | Up | RNA-directed DNA polymerase from mobile element jockey         |
| g25353    | 4.02 | 4.43E-02 | Up | RNA-directed DNA polymerase from mobile element jockey-like    |
| g70401    | 3.99 | 1.17E-03 | Up | N/A                                                            |
| g123      | 3.87 | 4.90E-04 | Up | HELRODRAFT_173799                                              |
| g88013    | 3.86 | 1.86E-02 | Up | Hypothetical protein Y032_0290g1543                            |
| g4144     | 3.74 | 3.17E-02 | Up | Hypothetical protein Y032_0258g465                             |
| g87277    | 3.71 | 1.24E-02 | Up | D(1)-like dopamine receptor                                    |
| g39713    | 3.49 | 3.55E-02 | Up | Envelope protein                                               |
| Novel0008 | 3.48 | 4.74E-02 | Up | N/A                                                            |
| 9         |      |          |    |                                                                |
| g48810    | 3.45 | 1.68E-02 | Up | Putative RNA-directed DNA polymerase from transposon X-element |
| g24423    | 3.42 | 6.25E-03 | Up | N/A                                                            |
| g48745    | 3.38 | 4.49E-03 | Up | Dana_GF27671                                                   |
| g40521    | 3.34 | 3.48E-02 | Up | LOC105431000 isoform X2                                        |
| g11771    | 3.32 | 1.42E-02 | Up | N/A                                                            |

---
